# Supplementary material
Source: PubMed Central journal article supplement (PMC2825434)
Supplement: supp_M109.041863_jbc.M109.041863-1.pdf [file supp_M109.041863_jbc.M109.041863-1.pdf]

## Supplemental Data

Dual specificity of Langerin to sulfated and mannosylated glycans via a single C-type carbohydrate recognition domain

Hiroaki Tateno, Koji Ohnishi, Rikio Yabe, Norihito Hayatsu, Takashi Sato, Motohiro Takeya, Hisashi Narimatsu, and Jun Hirabayashi

# Supplementary Fig.1. Glycans used for glycoconjugate microarray.

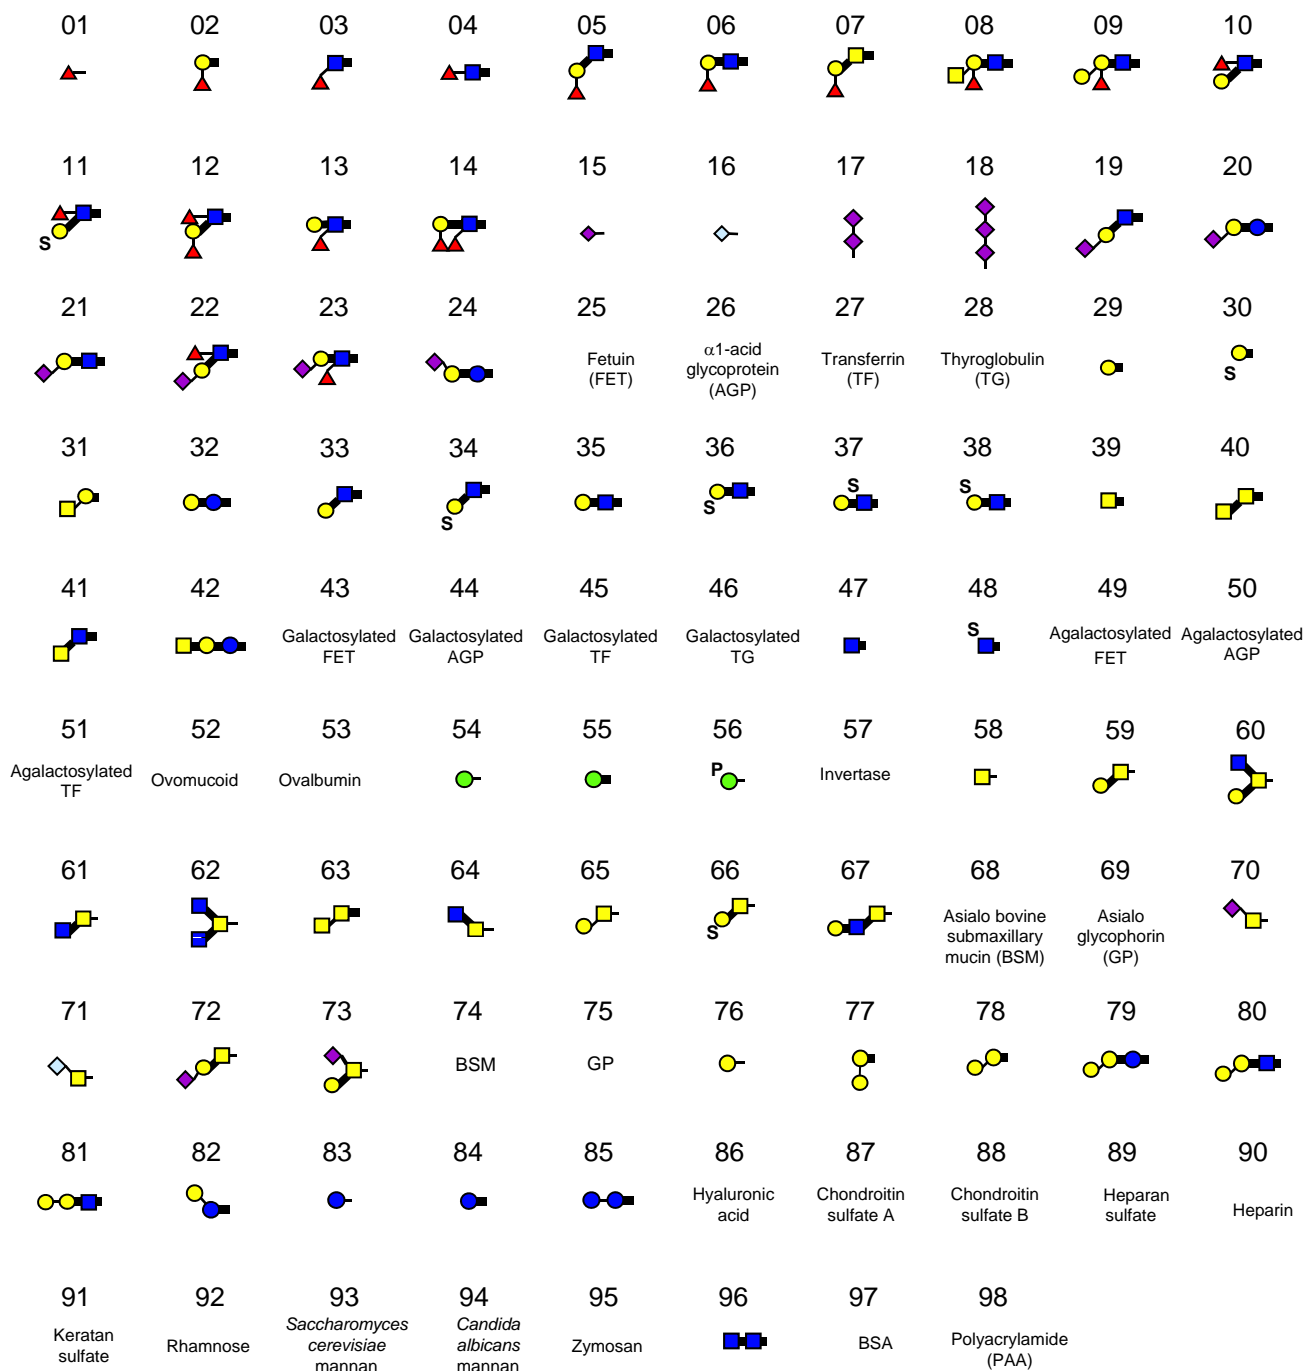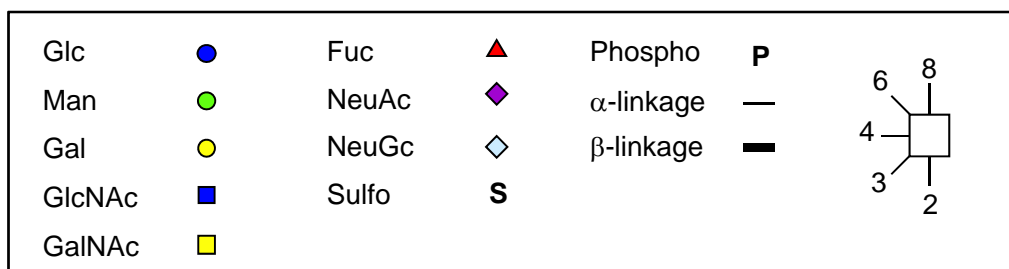

# Supplementary Fig. 2. Schematic representation of PA-glycans used for FAC

## N-glycans

### High mannose

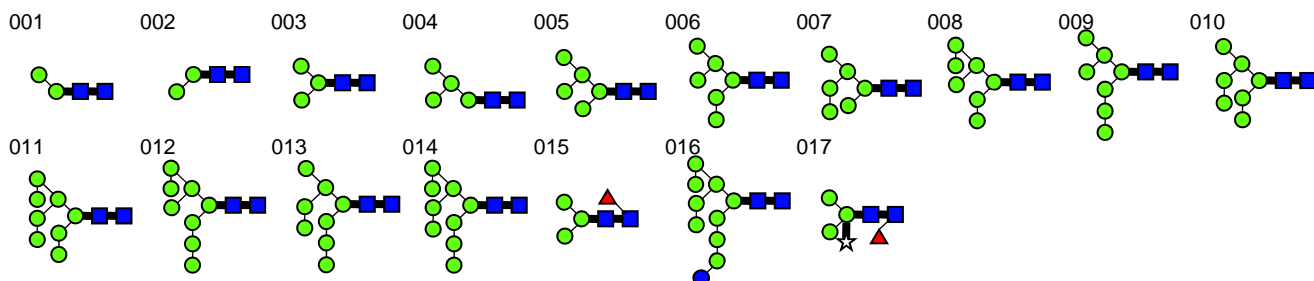

### Hybrid

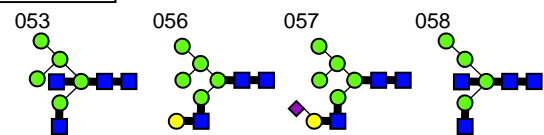

### Agalactosylated

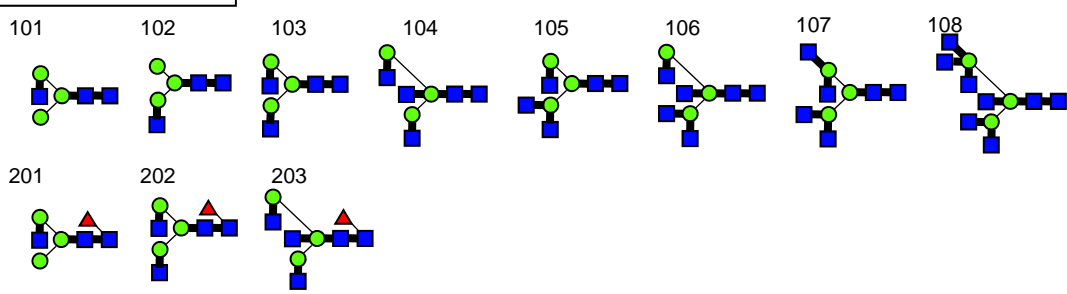

### Galactosylated

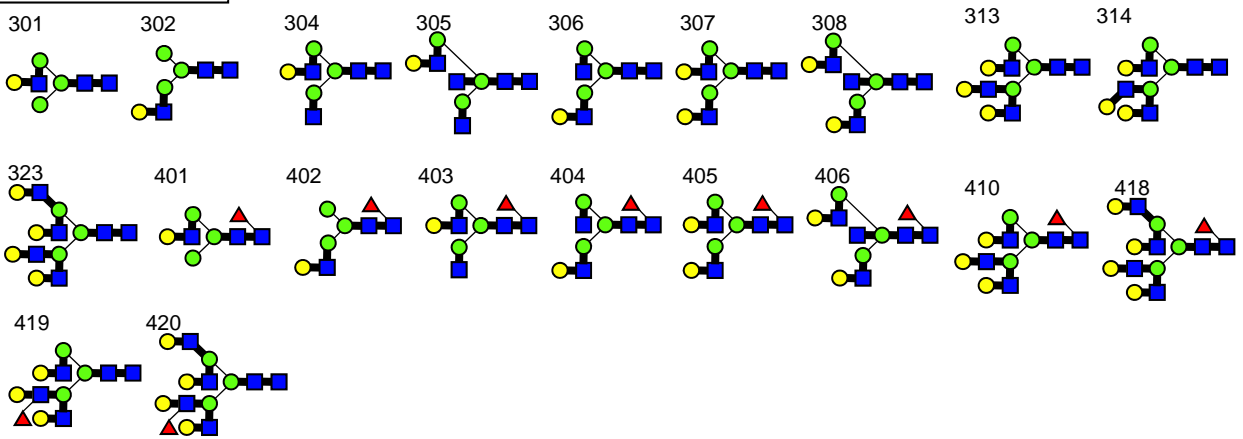

**Sialylated**

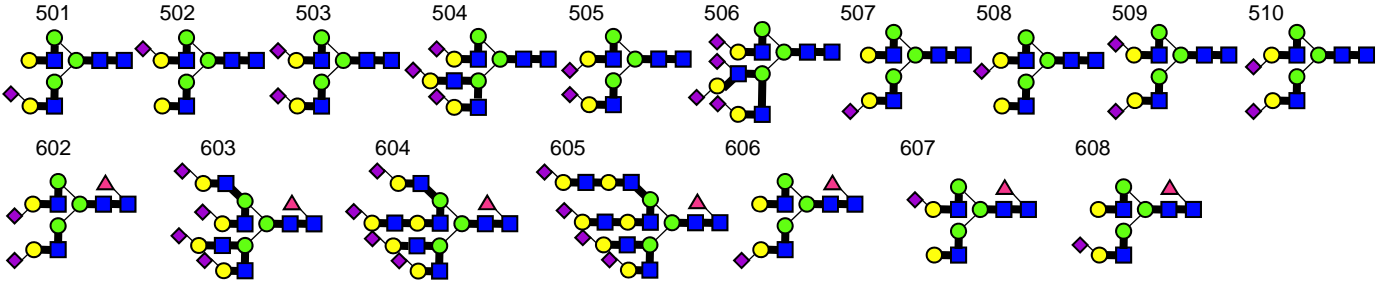

**Glycolipid type glycans**

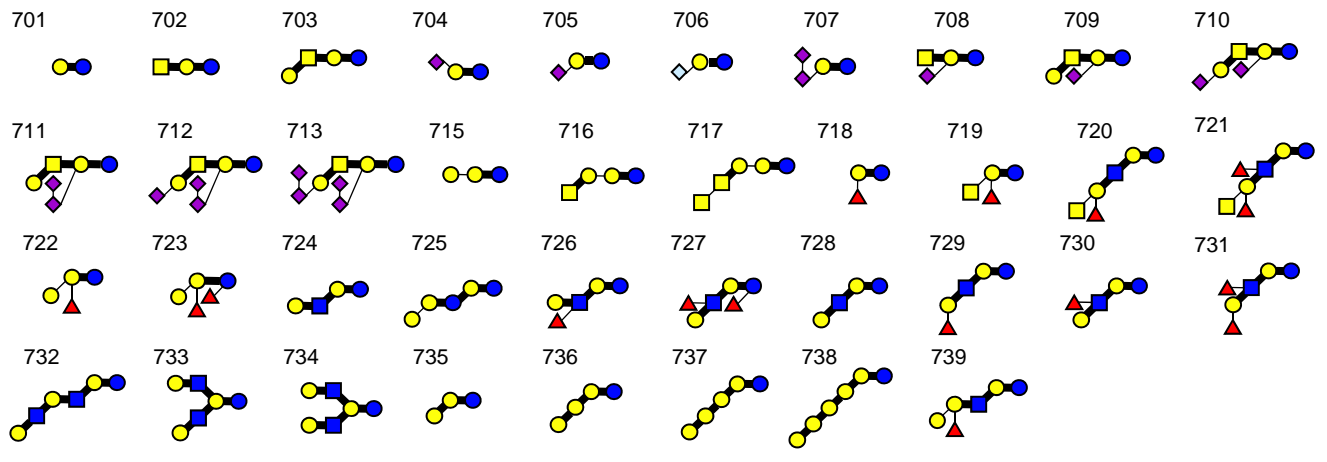

**Other type glycans**

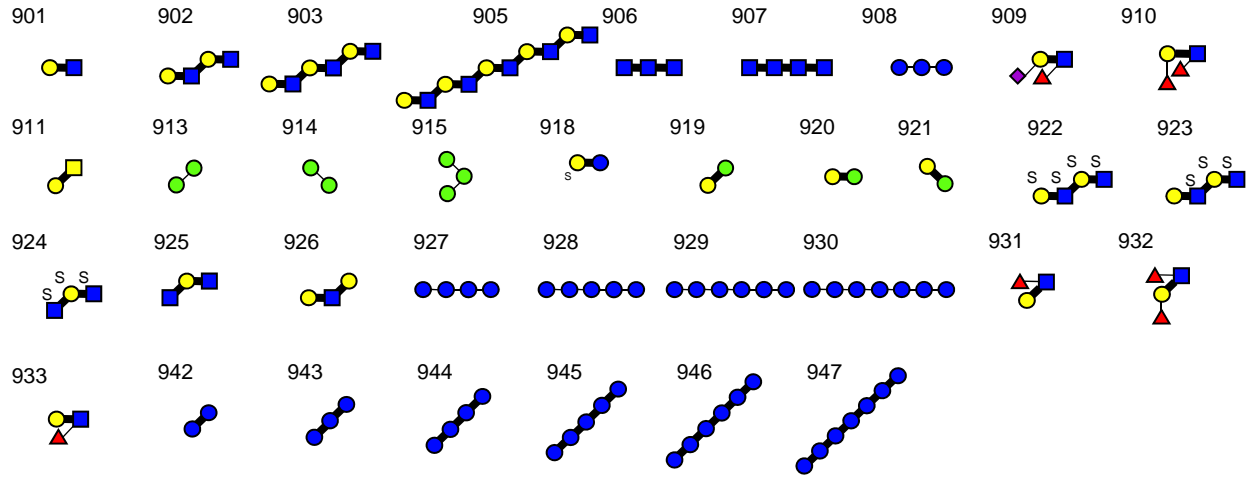

|        |  |       |  |               |   |  |
|--------|--|-------|--|---------------|---|--|
| Glc    |  | Fuc   |  | Sulfo         | S |  |
| Man    |  | NeuAc |  | alpha-linkage | — |  |
| Gal    |  | NeuGc |  | beta-linkage  | █ |  |
| GlcNAc |  | Xyl   |  |               |   |  |
| GalNAc |  | GalA  |  |               |   |  |

DC-SIGN

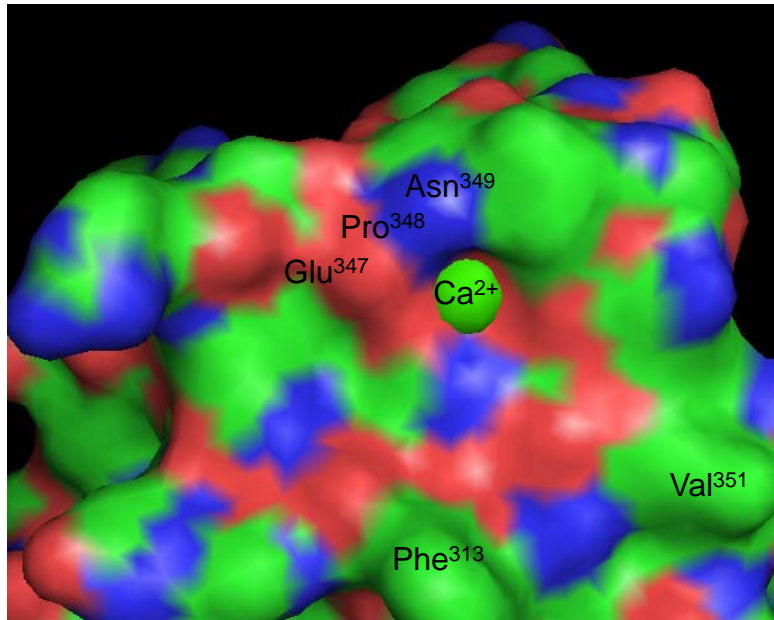

Langerin

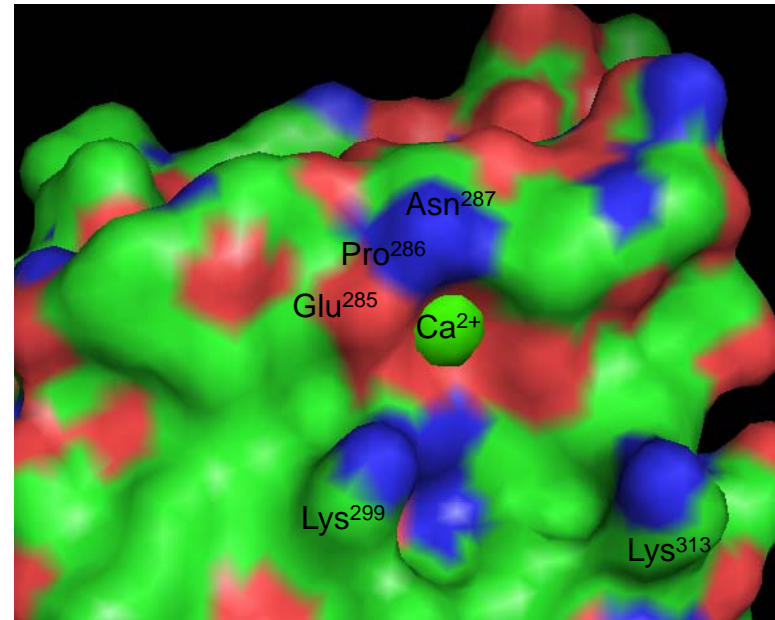

Supplementary Fig. 3. Comparison of color-coded CRDs according to electrostatic potential of DC-SIGN and Langerin. Structural data of DC-SIGN (1K9J) and Langerin (3BC6) were obtained from the RCSB PDB.

Supplementary Table I

| Number | Trivial name                          | Presentation | Glycans                                                                        | Co.        | Cat#          |
|--------|---------------------------------------|--------------|--------------------------------------------------------------------------------|------------|---------------|
| 1      | $\alpha$ Fuc                          | PAA          | Fuc $\alpha$ 1-PAA                                                             | Glycotech  | 01-007        |
| 2      | Fuc $\alpha$ 2Gal                     | PAA          | Fuc $\alpha$ 1-2Gal $\beta$ 1-PAA                                              | Glycotech  | 01-019        |
| 3      | Fuc $\alpha$ 3GlcNAc                  | PAA          | Fuc $\alpha$ 1-3GlcNAc $\beta$ 1-PAA                                           | Glycotech  | 01-024        |
| 4      | Fuc $\alpha$ 4GlcNAc                  | PAA          | Fuc $\alpha$ 1-4GlcNAc $\beta$ 1-PAA                                           | Glycotech  | 01-025        |
| 5      | H type1                               | PAA          | Fuc $\alpha$ 1-2Gal $\beta$ 1-3GlcNAc $\beta$ 1-PAA                            | Glycotech  | 01-037        |
| 6      | H type2                               | PAA          | Fuc $\alpha$ 1-2Gal $\beta$ 1-4GlcNAc $\beta$ 1-PAA                            | Glycotech  | 08-034        |
| 7      | H type3                               | PAA          | Fuc $\alpha$ 1-2Gal $\beta$ 1-3GalNAc $\alpha$ 1-PAA                           | Glycotech  | 08-060        |
| 8      | A                                     | PAA          | GalNAc $\alpha$ 1-3(Fuc $\alpha$ 1-2)Gal $\beta$ 1-4GlcNAc $\beta$ 1-PAA       | Glycotech  | 08-091        |
| 9      | B                                     | PAA          | Gal $\alpha$ 1-3(Fuc $\alpha$ 1-2)Gal $\beta$ 1-4GlcNAc $\beta$ 1-PAA          | Glycotech  | 08-092        |
| 10     | L $\epsilon$ <sup>a</sup>             | PAA          | Gal $\beta$ 1-3(Fuc $\alpha$ 1-4)GlcNAc $\beta$ 1-PAA                          | Glycotech  | 01-035        |
| 11     | I $\beta$ SIL $\epsilon$ <sup>a</sup> | PAA          | (3OSO <sub>2</sub> )Gal $\beta$ 1-3(Fuc $\alpha$ 1-4)GlcNAc $\beta$ 1-PAA      | Glycotech  | 01-040        |
| 12     | L $\epsilon$ <sup>b</sup>             | PAA          | Fuc $\alpha$ 1-2Gal $\beta$ 1-3(Fuc $\alpha$ 1-4)GlcNAc $\beta$ 1-PAA          | Glycotech  | 08-042        |
| 13     | L $\epsilon$ <sup>c</sup>             | PAA          | Gal $\beta$ 1-4(Fuc $\alpha$ 1-3)GlcNAc $\beta$ 1-PAA                          | Glycotech  | 01-036        |
| 14     | L $\epsilon$ <sup>d</sup>             | PAA          | Fuc $\alpha$ 1-2Gal $\beta$ 1-4(Fuc $\alpha$ 1-3)GlcNAc $\beta$ 1-PAA          | Glycotech  | 08-043        |
| 15     | $\alpha$ Neu5Ac                       | PAA          | Neu5Ac $\alpha$ 2-PAA                                                          | Glycotech  | 01-012        |
| 16     | $\alpha$ Neu5Gc                       | PAA          | Neu5Gc $\alpha$ 2-PAA                                                          | Glycotech  | 01-051        |
| 17     | Sia2                                  | PAA          | Neu5Ac $\alpha$ 2-8Neu5Ac $\alpha$ 2-PAA                                       | Glycotech  | 08-064        |
| 18     | Sia3                                  | PAA          | Neu5Ac $\alpha$ 2-8Neu5Ac $\alpha$ 2-8Neu5Ac $\alpha$ 2-PAA                    | Glycotech  | 01-081        |
| 19     | 3'Sial $\epsilon$ <sup>c</sup>        | PAA          | Neu5Ac $\alpha$ 2-3Gal $\beta$ 1-3GlcNAc $\beta$ 1-PAA                         | Glycotech  | 01-078        |
| 20     | 3'SL                                  | PAA          | Neu5Ac $\alpha$ 2-3Gal $\beta$ 1-4Glc $\beta$ 1-PAA                            | Glycotech  | 01-038        |
| 21     | 3'SLN                                 | PAA          | Neu5Ac $\alpha$ 2-3Gal $\beta$ 1-4GlcNAc $\beta$ 1-PAA                         | Glycotech  | 01-077        |
| 22     | sl $\epsilon$ <sup>a</sup>            | PAA          | Neu5Ac $\alpha$ 2-3Gal $\beta$ 1-3(Fuc $\alpha$ 1-4)GlcNAc $\beta$ 1-PAA       | Glycotech  | 08-044        |
| 23     | sl $\epsilon$ <sup>x</sup>            | PAA          | Neu5Ac $\alpha$ 2-3Gal $\beta$ 1-4(Fuc $\alpha$ 1-3)GlcNAc $\beta$ 1-PAA       | Glycotech  | 01-045        |
| 24     | 6'SL                                  | PAA          | Neu5Ac $\alpha$ 2-6Gal $\beta$ 1-4Glc $\beta$ 1-PAA                            | Glycotech  | 01-039        |
| 25     | FET                                   | Glycoprotein | Fetuin (Complex-type N-glycans and O-glycans)                                  | Sigma      | F3004         |
| 26     | AGP                                   | Glycoprotein | $\alpha$ 1-acid glycoprotein (Complex-type N-glycans)                          | Sigma      | G9885         |
| 27     | TF                                    | Glycoprotein | Transferrin (Complex-type N-glycans)                                           | Sigma      | T3309         |
| 28     | TG                                    | Glycoprotein | Porcine thyroglobulin (Complex and high-mannose-type N-glycans)                | Sigma      | T1126         |
| 29     | $\beta$ Gal                           | PAA          | Gal $\beta$ 1-PAA                                                              | Glycotech  | 01-004        |
| 30     | I $\beta$ S $\beta$ Gal               | PAA          | (3OSO <sub>2</sub> )Gal $\beta$ 1-PAA                                          | Glycotech  | 01-015        |
| 31     | A-di                                  | PAA          | GalNAc $\alpha$ 1-3Gal $\beta$ 1-PAA                                           | Glycotech  | 01-017        |
| 32     | Lac                                   | PAA          | Gal $\beta$ 1-4Glc $\beta$ 1-PAA                                               | Glycotech  | 01-021        |
| 33     | L $\epsilon$ <sup>c</sup>             | PAA          | Gal $\beta$ 1-3GlcNAc $\beta$ 1-PAA                                            | Glycotech  | 01-020        |
| 34     | I $\beta$ SIL $\epsilon$ <sup>c</sup> | PAA          | (3OSO <sub>2</sub> )Gal $\beta$ 1-3GlcNAc $\beta$ 1-PAA                        | Glycotech  | 01-062        |
| 35     | LN                                    | PAA          | Gal $\beta$ 1-4GlcNAc $\beta$ 1-PAA                                            | Glycotech  | 01-022        |
| 36     | I $\beta$ SILN                        | PAA          | (3OSO <sub>2</sub> )Gal $\beta$ 1-4GlcNAc $\beta$ 1-PAA                        | Glycotech  | 01-061        |
| 37     | I $\beta$ SILN                        | PAA          | Gal $\beta$ 1-4(6OSO <sub>2</sub> )GlcNAc $\beta$ 1-PAA                        | Glycotech  | 01-066        |
| 38     | I $\beta$ SILN                        | PAA          | (6OSO <sub>2</sub> )Gal $\beta$ 1-4GlcNAc $\beta$ 1-PAA                        | Glycotech  | 01-068        |
| 39     | $\beta$ GalNAc                        | PAA          | GalNAc $\beta$ 1-PAA                                                           | Glycotech  | 01-011        |
| 40     | di-GalNAc $\beta$                     | PAA          | GalNAc $\beta$ 1-3GalNAc $\beta$ 1-PAA                                         | Glycotech  | 01-070        |
| 41     | LDN                                   | PAA          | GalNAc $\beta$ 1-4GlcNAc $\beta$ 1-PAA                                         | Glycotech  | 01-057        |
| 42     | GA2                                   | PAA          | GalNAc $\beta$ 1-4Gal $\beta$ 1-4Glc $\beta$ 1-PAA                             | Glycotech  | 08-074        |
| 43     | Asialo-FET                            | Glycoprotein | Asialo fetuin (Desialylated complex-type N- and O-glycans)                     | Sigma      | F3004 (Acid-) |
| 44     | Asialo-AGP                            | Glycoprotein | Asialo $\alpha$ 1-acid glycoprotein (Desialylated complex-type N-glycans)      | Sigma      | G9885 (Acid-) |
| 45     | Asialo-TF                             | Glycoprotein | Asialo transferrin (Desialylated complex-type N-glycans)                       | Sigma      | T3309 (Acid-) |
| 46     | Asialo-TG                             | Glycoprotein | Asialo porcine thyroglobulin (Desialylated complex-type N-glycans)             | Sigma      | T1126 (Acid-) |
| 47     | $\beta$ GlcNAc                        | PAA          | GlcNAc $\beta$ 1-PAA                                                           | Glycotech  | 01-009        |
| 48     | I $\beta$ SILGlcNAc                   | PAA          | (6OSO <sub>2</sub> )GlcNAc $\beta$ 1-PAA                                       | Glycotech  | 01-016        |
| 49     | Agalacto-Fet                          | Glycoprotein | Agalacto fetuin (Agalactosylated complex-type N- and O-glycans)                | Sigma      | F3004         |
| 50     | Agalacto-AGP                          | Glycoprotein | Agalacto $\alpha$ 1-acid glycoprotein (Agalactosylated complex-type N-glycans) | Sigma      | G9885         |
| 51     | Agalacto-TF                           | Glycoprotein | Agalacto transferrin (Agalactosylated complex-type N-glycans)                  | Sigma      | T3309         |
| 52     | OVM                                   | Glycoprotein | Ovomucoid (Complex-type N-glycans)                                             | Sigma      | T2011         |
| 53     | OVA                                   | Glycoprotein | Ovoalbumin (Hybrid-type N-glycans)                                             | Sigma      | A2512         |
| 54     | $\alpha$ Man                          | PAA          | Man $\alpha$ 1-PAA                                                             | Glycotech  | 01-005        |
| 55     | $\beta$ Man                           | PAA          | Man $\beta$ 1-PAA                                                              | Glycotech  | 01-050        |
| 56     | I $\beta$ F $\beta$ Man               | PAA          | (6OPO <sub>2</sub> )Man $\alpha$ 1-PAA                                         | Glycotech  | 01-006        |
| 57     | INV                                   | Glycoprotein | Yeast invertase (High mannose-type N-glycans)                                  | Sigma      | I4504         |
| 58     | Tn                                    | PAA          | GalNAc $\alpha$ 1-PAA                                                          | Glycotech  | 01-010        |
| 59     | Core1                                 | PAA          | Gal $\beta$ 1-3GalNAc $\alpha$ 1-PAA                                           | Glycotech  | 08-023        |
| 60     | Core2                                 | PAA          | Gal $\beta$ 1-3(GlcNAc $\beta$ 1-6)GalNAc $\alpha$ 1-PAA                       | Glycotech  | 01-083        |
| 61     | Core3                                 | PAA          | GlcNAc $\beta$ 1-3GalNAc $\alpha$ 1-PAA                                        | Glycotech  | 01-071        |
| 62     | Core4                                 | PAA          | GlcNAc $\beta$ 1-3(GlcNAc $\beta$ 1-6)GalNAc $\alpha$ 1-PAA                    | Glycotech  | 01-089        |
| 63     | Forssman                              | PAA          | GalNAc $\alpha$ 1-3GalNAc $\beta$ 1-PAA                                        | Glycotech  | 01-026        |
| 64     | Core6                                 | PAA          | GlcNAc $\beta$ 1-6GalNAc $\alpha$ 1-PAA                                        | Glycotech  | 01-072        |
| 65     | Core8                                 | PAA          | Gal $\alpha$ 1-3GalNAc $\alpha$ 1-PAA                                          | Glycotech  | 01-028        |
| 66     | I $\beta$ SICore1                     | PAA          | (3OSO <sub>2</sub> )Gal $\beta$ 1-3GalNAc $\alpha$ 1-PAA                       | Glycotech  | 08-069        |
| 67     | Gal $\beta$ -Core3                    | PAA          | Gal $\beta$ 1-4GlcNAc $\beta$ 1-3GalNAc $\alpha$ 1-PAA                         | Glycotech  | 01-116        |
| 68     | Asialo-BSM                            | Glycoprotein | Asialo bovine submaxillary mucin (Tn)                                          | Sigma      | M3895 (Acid-) |
| 69     | Asialo-GP                             | Glycoprotein | Asialo human glycoporphin MN (T)                                               | Sigma      | A9791 (Acid-) |
| 70     | STn                                   | PAA          | Neu5Ac $\alpha$ 2-6GalNAc $\alpha$ 1-PAA                                       | Glycotech  | 01-059        |
| 71     | STn (Gc)                              | PAA          | Neu5Gc $\alpha$ 2-6GalNAc $\alpha$ 1-PAA                                       | Glycotech  | 01-107        |
| 72     | ST                                    | PAA          | Neu5Ac $\alpha$ 2-3Gal $\beta$ 1-3GalNAc $\alpha$ 1-PAA                        | Glycotech  | 01-088        |
| 73     | Sia $\alpha$ 2-6Core1                 | PAA          | Gal $\beta$ 1-3(Neu5Ac $\alpha$ 2-6)GalNAc $\alpha$ 1-PAA                      | Glycotech  | 01-113        |
| 74     | BSM                                   | Glycoprotein | Bovine submaxillary mucin (Sialyl Tn)                                          | Sigma      | M3895         |
| 75     | GP                                    | Glycoprotein | Human glycoporphin (Disialyl T and sialyl Tn)                                  | Sigma      | G5017         |
| 76     | $\alpha$ Gal                          | PAA          | Gal $\alpha$ 1-PAA                                                             | Glycotech  | 01-003        |
| 77     | Gal $\alpha$ 1-2Gal                   | PAA          | Gal $\alpha$ 1-2Gal $\beta$ 1-PAA                                              | Glycotech  | 01-056        |
| 78     | Gal $\alpha$ 1-3Gal                   | PAA          | Gal $\alpha$ 1-3Gal $\beta$ 1-PAA                                              | Glycotech  | 01-018        |
| 79     | Gal $\alpha$ 1-3Lac                   | PAA          | Gal $\alpha$ 1-3Gal $\beta$ 1-4Glc $\beta$ 1-PAA                               | Glycotech  | 01-075        |
| 80     | Gal $\alpha$ 1-3LN                    | PAA          | Gal $\alpha$ 1-3Gal $\beta$ 1-4GlcNAc $\beta$ 1-PAA                            | Glycotech  | 01-079        |
| 81     | Gal $\alpha$ 1-4LN                    | PAA          | Gal $\alpha$ 1-4Gal $\beta$ 1-4GlcNAc $\beta$ 1-PAA                            | Glycotech  | 01-110        |
| 82     | Melibiose                             | PAA          | Gal $\alpha$ 1-6Glc $\beta$ 1-PAA                                              | Glycotech  | 01-063        |
| 83     | $\alpha$ Glc                          | PAA          | Glc $\alpha$ 1-PAA                                                             | Glycotech  | 01-001        |
| 84     | $\beta$ Glc                           | PAA          | Glc $\beta$ 1-PAA                                                              | Glycotech  | 01-002        |
| 85     | Maltose                               | PAA          | Glc $\alpha$ 1-4Glc $\beta$ 1-PAA                                              | Glycotech  | 01-054        |
| 86     | HA                                    | BSA          | Hyaluronic acid-BSA                                                            | Seikagaku  | 400720        |
| 87     | CSA                                   | BSA          | Chondroitin Sulfate A-BSA                                                      | Seikagaku  | 400655        |
| 88     | CSB                                   | BSA          | Chondroitin Sulfate B-BSA                                                      | Seikagaku  | 400660        |
| 89     | HS                                    | BSA          | Heparan Sulfate-BSA                                                            | Seikagaku  | 400700        |
| 90     | HP                                    | BSA          | Heparin-BSA                                                                    | Calbiochem | 375095        |
| 91     | KS                                    | BSA          | Keratan Sulfate-BSA                                                            | Seikagaku  | 400760        |
| 92     | $\alpha$ Rha                          | PAA          | Rhamnose $\alpha$ 1-PAA                                                        | Glycotech  | 01-008        |
| 93     | Mannan (SC)                           | Glycoprotein | <i>S. cerevisiae</i> mannan                                                    | Sigma      | M7504         |
| 94     | Mannan (CA)                           | Glycoprotein | <i>C. albicans</i> mannan                                                      | Takara     | MG001         |
| 95     | Zyosan                                | Glycoprotein | Zyosan                                                                         | Sigma      | Z4250         |
| 96     | Chitobiose                            | PAA          | GlcNAc $\beta$ 1-4GlcNAc $\beta$ 1-PAA                                         | Glycotech  | 08-057        |
| 97     | BSA                                   | BSA          | -                                                                              | Sigma      | A7638         |
| 98     | Negative PAA                          | PAA          | -                                                                              | Glycotech  | 01-000        |
